# Supplementary material for: Global, Regional, and National Burden of Tuberculosis Among Older Adults from 1990 to 2021: A Systematic Analysis Based on the 2021 Global Burden of Disease
Source: Research Square preprint supplement (doi:10.21203/rs.3.rs-7158793/v1), 2025-09-30
Supplement: Supplementary file 1 [file 17936f1985098a52b885d22e.docx]

Table 1: ASRs and EAPCs for Global, 5 SDI Regions, and 21 GBD Regions in 1990 and 2021

| location | ASIR | | | ASPR | | | ASMR | | | ASDR | | |
| --- | --- | --- | --- | --- | --- | --- | --- | --- | --- | --- | --- | --- |
| 1990 (per 100,000 population, 95% UI) | 2021 (per 100,000 population, 95% UI) | EAPCs (95% CI) | 1990 (per 100,000 population, 95% UI) | 2021 (per 100,000 population, 95% UI) | EAPCs (95% CI) | 1990 (per 100,000 population, 95% UI) | 2021 (per 100,000 population, 95% UI) | EAPCs (95% CI) | 1990 (per 100,000 population, 95% UI) | 2021 (per 100,000 population, 95% UI) | EAPCs (95% CI) |
| Global | 341.79(232.94,465.00) | 190.44(133.71,254.37) | -2.18(-2.32,-2.03) | 33558.62(24742.48,42127.18) | 27606.44(20577.01,34706.94) | -0.80(-0.86,-0.73) | 146.38(121.15,167.61) | 51.58(46.08,58.89) | -3.53(-3.71,-3.35) | 3089.48(2599.36,3523.61) | 1094.15(981.34,1238.23) | -3.52(-3.70,-3.33) |
| Male | 464.82(318.89,629.47) | 243.47(172.41,322.39) | -2.40(-2.55,-2.25) | 35018.22(25914.12,43780.85) | 28864.68(21671.82,35956.72) | -0.80(-0.86,-0.73) | 214.77(162.09,262.95) | 71.29(61.88,86.94) | -3.75(-3.94,-3.57) | 4418.10(3420.17,5336.10) | 1493.55(1307.17,1794.81) | -3.69(-3.88,-3.51) |
| Female | 250.19(169.44,343.22) | 146.42(101.62,198.24) | -1.98(-2.12,-1.85) | 32453.36(23869.46,40888.52) | 26506.30(19592.96,33571.91) | -0.81(-0.88,-0.75) | 96.65(84.31,110.90) | 35.82(31.69,40.40) | -3.32(-3.49,-3.16) | 2044.94(1800.83,2323.78) | 754.07(672.31,844.11) | -3.34(-3.52,-3.15) |
| High SDI | 49.65(34.56,67.07) | 20.38(14.03,28.16) | -3.05(-3.15,-2.95) | 23087.48(16776.67,29780.60) | 15235.45(10901.41,20329.83) | -1.47(-1.53,-1.42) | 15.62(14.16,16.88) | 3.44(2.87,3.87) | -5.36(-5.58,-5.13) | 305.97(278.92,331.07) | 59.13(50.65,66.99) | -5.78(-6.01,-5.56) |
| High-middle SDI | 135.96(93.33,182.87) | 65.28(46.21,86.72) | -2.69(-2.85,-2.52) | 36036.99(26684.15,44883.85) | 29803.64(22616.91,36484.87) | -0.80(-0.88,-0.73) | 38.31(31.85,44.91) | 8.10(6.98,9.60) | -5.39(-5.66,-5.12) | 822.14(691.99,956.94) | 193.79(166.77,225.94) | -5.02(-5.27,-4.77) |
| Middle SDI | 417.24(288.21,559.49) | 211.28(151.91,278.04) | -2.50(-2.61,-2.39) | 40699.47(29753.92,51457.04) | 35221.12(26480.40,43762.27) | -0.66(-0.74,-0.59) | 174.39(143.34,198.18) | 45.08(39.18,54.04) | -4.45(-4.62,-4.28) | 3433.99(2867.67,3876.95) | 953.46(842.28,1128.12) | -4.24(-4.40,-4.08) |
| Low-middle SDI | 952.30(627.83,1343.13) | 473.16(329.39,648.68) | -2.52(-2.64,-2.39) | 36974.40(27228.04,46773.00) | 27544.44(20203.95,35336.05) | -1.05(-1.12,-0.98) | 446.18(361.94,525.18) | 155.38(134.48,181.25) | -3.59(-3.77,-3.42) | 9117.29(7573.08,10601.53) | 3081.55(2700.23,3560.89) | -3.66(-3.83,-3.48) |
| Low SDI | 1206.80(870.83,1571.66) | 683.78(481.18,909.73) | -2.17(-2.36,-1.98) | 44282.58(34123.48,52990.67) | 34023.54(25254.44,42782.77) | -0.92(-0.99,-0.86) | 664.40(537.14,810.56) | 288.38(248.33,339.44) | -2.95(-3.11,-2.78) | 13303.67(10903.20,15994.82) | 5509.92(4797.59,6471.05) | -3.08(-3.26,-2.90) |
| Andean Latin America | 381.59(269.64,508.41) | 115.99(78.79,162.04) | -4.27(-4.61,-3.92) | 39772.66(29250.97,50353.25) | 18507.39(12874.32,25125.50) | -2.48(-2.56,-2.39) | 187.19(150.02,230.27) | 30.35(22.47,40.62) | -6.15(-6.53,-5.78) | 3781.47(3046.15,4598.89) | 603.76(458.74,795.91) | -6.18(-6.55,-5.80) |
| Australasia | 15.22(10.04,21.99) | 5.72(3.81,8.13) | -3.38(-3.66,-3.10) | 21311.78(14863.63,28903.03) | 11677.06(8104.11,16126.19) | -1.90(-1.98,-1.83) | 3.74(3.30,4.16) | 0.93(0.78,1.07) | -4.78(-5.09,-4.46) | 71.30(62.89,80.07) | 17.04(14.30,19.94) | -4.94(-5.25,-4.62) |
| Caribbean | 68.95(51.06,88.03) | 40.35(27.26,55.60) | -1.85(-1.93,-1.77) | 38117.58(28935.37,47211.35) | 24340.23(17500.44,31568.42) | -1.46(-1.50,-1.41) | 33.39(23.35,91.40) | 13.08(8.21,34.58) | -2.86(-3.04,-2.68) | 690.16(479.67,1916.01) | 274.59(173.65,719.17) | -2.88(-3.07,-2.68) |
| Central Asia | 115.29(80.86,154.80) | 84.21(57.73,115.68) | -0.87(-1.07,-0.66) | 42043.30(31390.00,52023.87) | 25781.24(18219.02,34523.09) | -1.61(-1.76,-1.47) | 26.24(23.93,28.91) | 11.27(9.76,12.87) | -3.47(-4.19,-2.75) | 637.31(584.10,697.92) | 270.83(235.49,309.84) | -3.48(-4.19,-2.76) |
| Central Europe | 69.43(48.17,94.86) | 24.40(16.39,34.42) | -3.55(-3.66,-3.44) | 38175.28(28102.95,48303.72) | 17651.50(12294.30,24016.65) | -2.58(-2.63,-2.53) | 18.06(16.99,19.08) | 3.69(3.32,4.04) | -5.64(-5.94,-5.33) | 376.06(352.64,399.60) | 80.58(72.69,89.09) | -5.47(-5.77,-5.16) |
| Central Latin America | 116.98(85.11,151.33) | 42.70(28.78,59.03) | -3.35(-3.48,-3.21) | 45941.51(35178.66,55078.41) | 29396.16(21173.03,38399.09) | -1.42(-1.47,-1.36) | 62.71(58.76,65.93) | 10.48(9.08,12.05) | -6.02(-6.42,-5.61) | 1212.94(1146.33,1275.89) | 217.09(189.69,248.50) | -5.79(-6.19,-5.40) |
| Central Sub-Saharan Africa | 1284.47(925.50,1672.94) | 949.61(684.99,1224.26) | -0.97(-1.22,-0.71) | 50621.82(38821.18,60135.15) | 48747.24(36995.32,58713.34) | -0.06(-0.15,0.03) | 791.05(476.87,1141.09) | 466.92(310.51,682.85) | -1.72(-2.03,-1.41) | 16277.49(10362.43,22861.93) | 9510.94(6561.26,13484.70) | -1.73(-2.03,-1.42) |
| East Asia | 300.71(199.78,411.79) | 104.71(74.92,137.34) | -3.56(-3.70,-3.42) | 41076.49(29154.57,52411.78) | 40785.41(31000.84,49427.15) | -0.34(-0.46,-0.21) | 101.44(83.14,121.85) | 12.39(9.98,15.61) | -6.93(-7.21,-6.65) | 2038.70(1694.30,2424.68) | 297.05(241.93,363.72) | -6.32(-6.56,-6.09) |
| Eastern Europe | 81.39(53.88,114.61) | 44.22(28.12,65.20) | -2.50(-3.13,-1.87) | 37675.73(27559.38,48055.41) | 19969.17(13949.02,27065.96) | -2.17(-2.36,-1.99) | 13.78(13.16,14.39) | 5.74(5.08,6.43) | -3.21(-4.01,-2.40) | 337.11(318.72,356.69) | 139.00(123.06,156.75) | -3.27(-4.13,-2.41) |
| Eastern Sub-Saharan Africa | 1656.14(1227.80,2112.15) | 862.30(610.01,1133.58) | -2.50(-2.74,-2.26) | 50255.76(40054.23,58239.93) | 40809.42(30891.86,49544.70) | -0.68(-0.71,-0.64) | 963.70(740.01,1230.52) | 407.62(325.75,494.60) | -3.04(-3.20,-2.88) | 18835.77(14743.79,23653.32) | 7632.11(6177.78,9227.19) | -3.17(-3.33,-3.02) |
| High-income Asia Pacific | 140.35(100.13,184.79) | 48.28(32.85,67.31) | -3.41(-3.65,-3.17) | 40338.49(30126.72,49816.15) | 17369.75(12119.63,23819.25) | -2.82(-2.87,-2.76) | 38.64(33.47,44.58) | 7.45(5.90,8.72) | -5.61(-5.82,-5.40) | 736.27(642.02,846.13) | 117.06(95.32,137.37) | -6.27(-6.48,-6.06) |
| High-income North America | 10.99(7.24,15.87) | 4.24(2.73,6.09) | -3.83(-4.23,-3.43) | 14745.44(10329.37,20227.39) | 14700.13(10303.42,20223.55) | -0.09(-0.14,-0.04) | 3.66(3.32,3.88) | 0.77(0.68,0.83) | -5.53(-6.06,-5.01) | 69.37(63.61,74.15) | 15.41(13.60,17.14) | -5.35(-5.86,-4.84) |
| North Africa and Middle East | 196.74(141.89,255.29) | 75.64(51.47,104.78) | -3.17(-3.24,-3.09) | 45395.69(36176.17,52701.35) | 27889.52(20116.77,36126.39) | -1.61(-1.65,-1.57) | 84.07(59.79,158.56) | 19.56(14.62,30.47) | -4.83(-4.97,-4.70) | 1577.61(1150.35,2843.25) | 354.97(269.89,544.83) | -4.93(-5.08,-4.78) |
| Oceania | 471.03(359.04,583.26) | 332.48(257.77,401.27) | -1.14(-1.17,-1.11) | 50631.97(40108.81,58095.33) | 51122.00(40842.95,57906.35) | 0.05(0.04,0.06) | 318.24(221.67,460.01) | 178.83(129.71,248.28) | -1.85(-1.91,-1.79) | 6424.35(4565.40,9110.63) | 3680.31(2774.68,4970.93) | -1.76(-1.81,-1.71) |
| South Asia | 1048.62(646.81,1555.09) | 508.54(349.31,709.35) | -2.71(-2.84,-2.58) | 29963.38(19705.63,41732.01) | 23498.06(16564.11,31380.52) | -1.02(-1.11,-0.93) | 493.68(403.59,579.35) | 151.68(129.68,182.58) | -4.08(-4.26,-3.91) | 10136.69(8446.82,11741.78) | 2993.99(2582.00,3541.96) | -4.16(-4.33,-3.99) |
| Southeast Asia | 862.99(655.60,1078.18) | 527.70(393.69,663.87) | -1.73(-1.80,-1.66) | 47646.56(38376.02,54949.16) | 45100.86(35100.55,53373.86) | -0.20(-0.22,-0.19) | 416.99(313.54,497.68) | 141.95(119.39,167.88) | -3.42(-3.63,-3.22) | 8156.95(6270.04,9619.77) | 2861.72(2458.15,3357.76) | -3.36(-3.55,-3.16) |
| Southern Latin America | 49.89(33.54,69.00) | 18.23(11.21,26.95) | -3.34(-3.43,-3.25) | 35444.88(25686.63,45386.69) | 19361.26(13543.69,26532.70) | -1.91(-1.93,-1.90) | 23.01(20.77,25.22) | 6.69(5.89,7.43) | -4.02(-4.25,-3.80) | 478.38(434.29,524.41) | 136.47(121.06,153.14) | -4.11(-4.33,-3.89) |
| Southern Sub-Saharan Africa | 685.73(476.65,907.04) | 385.96(227.99,579.64) | -1.52(-1.95,-1.08) | 48296.98(38347.31,55576.63) | 46718.19(37149.06,53378.10) | -0.07(-0.10,-0.04) | 277.04(221.94,351.20) | 239.38(205.95,279.37) | -0.32(-0.98,0.35) | 5938.67(4835.98,7367.18) | 5051.25(4387.68,5874.31) | -0.30(-0.98,0.38) |
| Tropical Latin America | 105.84(71.98,145.11) | 45.21(28.70,65.77) | -2.87(-2.97,-2.78) | 43590.65(32436.52,53645.74) | 29923.90(21550.06,38935.45) | -1.19(-1.26,-1.13) | 26.47(24.44,28.12) | 8.13(7.33,8.75) | -4.11(-4.32,-3.90) | 549.61(512.84,584.89) | 174.14(159.13,188.54) | -4.01(-4.20,-3.81) |
| Western Europe | 18.82(12.63,26.68) | 4.80(3.17,6.84) | -4.68(-4.83,-4.52) | 17672.93(12360.59,24226.77) | 8437.14(5877.21,11650.96) | -2.34(-2.43,-2.24) | 9.21(8.37,9.83) | 1.70(1.45,1.86) | -5.87(-6.10,-5.65) | 167.74(154.08,179.68) | 29.09(25.39,32.36) | -6.03(-6.25,-5.81) |
| Western Sub-Saharan Africa | 1092.19(811.67,1380.88) | 567.47(389.88,780.58) | -2.32(-2.64,-1.99) | 50106.46(39232.78,58185.35) | 32328.02(23250.48,42137.48) | -1.30(-1.48,-1.13) | 502.56(416.22,618.86) | 235.90(186.60,286.79) | -2.58(-2.81,-2.36) | 9676.50(8055.94,11820.33) | 4341.46(3487.76,5233.48) | -2.70(-2.93,-2.48) |
